# Supplementary material
Source: MDPI journal article supplement (https://www.mdpi.com/2304-6767/9/12/149)
Supplement: s1 [file s1]

**Table S1.** Italian IDAF-4C+ version.

| No. Item | English Version                                                                                                                                  | Italian Version                                                                                                                                                                                                                                            | Answers                                                      |
|----------|--------------------------------------------------------------------------------------------------------------------------------------------------|------------------------------------------------------------------------------------------------------------------------------------------------------------------------------------------------------------------------------------------------------------|--------------------------------------------------------------|
| IDAF-4C  |                                                                                                                                                  |                                                                                                                                                                                                                                                            |                                                              |
| C1       | I feel anxious shortly before going to the dentist                                                                                               | Mi sento ansioso poco prima di andare dal dentista                                                                                                                                                                                                         | In disaccordo to Fortemente d'accordo (5-point Likert Scale) |
| C2       | My heart beats faster when I go to the dentist                                                                                                   | Il mio cuore batte più veloce quando devo andare dal dentista                                                                                                                                                                                              | In disaccordo to Fortemente d'accordo (5-point Likert Scale) |
| C3       | I delay making appointments to dentist                                                                                                           | Ritardo nel prendere appuntamenti presso il dentista                                                                                                                                                                                                       | In disaccordo to Fortemente d'accordo (5-point Likert Scale) |
| C4       | I generally avoid going to the dentist because I find the experience unpleasant or distressing                                                   | In genere evito di andare dal dentista perché trovo l'esperienza spiacevole o angosciante                                                                                                                                                                  | In disaccordo to Fortemente d'accordo (5-point Likert Scale) |
| C5       | I think that something really bad would happen to me if I were to visit a dentist                                                                | Penso che potrebbe accadermi qualcosa di spiacevole se andassi dal dentista                                                                                                                                                                                | In disaccordo to Fortemente d'accordo (5-point Likert Scale) |
| C6       | I often think about all the things that might go wrong prior to going to the dentist                                                             | Prima di andare dal dentista penso spesso a tutto ciò che può andare storto                                                                                                                                                                                | In disaccordo to Fortemente d'accordo (5-point Likert Scale) |
| C7       | I get nervous or edgy about upcoming dental visits                                                                                               | Divento nervosa o irrequieto quando si approssimano le visite odontoiatriche                                                                                                                                                                               | In disaccordo to Fortemente d'accordo (5-point Likert Scale) |
| C8       | I feel afraid or fearful when visiting the dentist                                                                                               | Mi sento impaurito o spaventato quando il dentista mi visita                                                                                                                                                                                               | In disaccordo to Fortemente d'accordo (5-point Likert Scale) |
| IDAF-4P  |                                                                                                                                                  |                                                                                                                                                                                                                                                            |                                                              |
| P1       | Going to the dentist is actively avoided or else endured with intense fear or anxiety                                                            | Andare dal dentista è sempre evitato o sopportato con intensa paura ed ansia                                                                                                                                                                               | SI/NO                                                        |
| P2       | My fear of going to the dentist has been present for at least 6 months                                                                           | La mia paura di andare dal dentista è presente da almeno sei mesi                                                                                                                                                                                          | SI/NO                                                        |
| P3       | My fear, anxiety or avoidance of going to the dentist significantly affects my life in some way                                                  | La paura, l'ansia e l'evitare di andare dal dentista incidono significativamente sulla mia vita in molti modi (ad esempio ho dolore ai denti, evito di mangiare alcuni cibi, mi sento imbarazzato o impacciato per l'aspetto dei miei denti o della bocca) | SI/NO                                                        |
| P4       | I am afraid of going to the dentist because I am concerned I may have panic attack                                                               | Ho paura di andare dal dentista perché temo di avere un attacco di panico (paura improvvisa con sudorazione, cuore che batte forte, paura di morire o di perdere il controllo, dolore al petto)                                                            | SI/NO                                                        |
| P5       | I am afraid of going to the dentist because I am generally highly self-conscious or concerned about being watched or judged in social situations | Ho paura di andare dal dentista perché generalmente sono molto a disagio o preoccupato di essere osservato o giudicato in situazioni sociali                                                                                                               | SI/NO                                                        |
| IDAF-S   |                                                                                                                                                  |                                                                                                                                                                                                                                                            |                                                              |
| S1       | Painful or uncomfortable procedures                                                                                                              | Procedure dolorose o scomode                                                                                                                                                                                                                               | Per nulla to Moltissimo (5-point Likert Scale)               |

|     |                                           |                                                 |                                                |
|-----|-------------------------------------------|-------------------------------------------------|------------------------------------------------|
| S2  | Feeling embarrassed or ashamed            | Sensazioni di imbarazzo o vergogna              | Per nulla to Moltissimo (5-point Likert Scale) |
| S3  | Not in control of what is happening       | Non avere il controllo di ciò che sta accadendo | Per nulla to Moltissimo (5-point Likert Scale) |
| S4  | Feeling sick, queasy or disgusted         | Sensazione di malessere, nausea o disgusto      | Per nulla to Moltissimo (5-point Likert Scale) |
| S5  | Numbness caused by the anaesthetic        | Intorbidimento causato dall'anestestico         | Per nulla to Moltissimo (5-point Likert Scale) |
| S6  | Not knowing what dentist is going to do   | Non sapere cosa farà il dentista                | Per nulla to Moltissimo (5-point Likert Scale) |
| S7  | The cost of dental treatment              | Il costo del trattamento odontoiatrico          | Per nulla to Moltissimo (5-point Likert Scale) |
| S8  | Needles or injections                     | Aghi o iniezioni                                | Per nulla to Moltissimo (5-point Likert Scale) |
| S9  | Gagging or choking                        | Ostruzione o soffocamento                       | Per nulla to Moltissimo (5-point Likert Scale) |
| S10 | Having an unsympathetic or unkind dentist | Avere un dentista antipatico o scortese         | Per nulla to Moltissimo (5-point Likert Scale) |

English version is here presented as reported in Tolvanen et al. (2017) [45].
